# Supplementary material for: Construction of honey bee hive-like CuO/PbO heterojunction photocatalysts with enhanced antibiotic and dye degradation activity under visible light
Source: Royal Society of Chemistry journal article supplement (doi:10.1039/d4ew00270a), 2024-01-01
Supplement: d4ew00270a1.pdf [file d4ew00270a1.pdf]

**/Construction of honey bee hives like CuO/PbO heterojunction  
photocatalysts with enhanced antibiotic and dye degradation activity under  
visible light**

Karina Bano<sup>a</sup>, Prit Pal Singh<sup>\*a</sup>, Sandeep Kumar<sup>b</sup>, Shakir Mahmood Saeed<sup>c</sup>, Saurabh  
Aggarwal<sup>d</sup>, Ranvijay Kumar<sup>e</sup>, Sandeep Kaushal<sup>a,f\*</sup>

<sup>a</sup> Sri Guru Granth Sahib World University, Fatehgarh Sahib, Punjab, India

<sup>b</sup>Department of Chemistry, Akal University, Talwandi Sabo, Bathinda 151302, Punjab, India

<sup>c</sup>Department of Pharmacy, Al-Noor University College, Nineveh, Iraq

<sup>d</sup>Uttaranchal Institute of Technology, Uttaranchal University, Dehradun, India

<sup>e</sup>University Centre for Research and Development, Chandigarh University, Gharuan,  
Mohali, Punjab, India

<sup>f</sup>Regional Institute of Education, National Council of Educational Research and Training,  
Ajmer, Rajasthan, India

Address for Correspondence:

Prof. Prit Pal Singh

Sri Guru Granth Sahib World University, Fatehgarh Sahib, Punjab, India

E-mail: [dhillonps2003@gmail.com](mailto:dhillonps2003@gmail.com)

Dr. Sandeep Kaushal

Associate Professor

Regional Institute of Education, National Council of Educational Research and Training,  
Ajmer, Rajasthan, India

Email: [kaushalsandeep33@gmail.com](mailto:kaushalsandeep33@gmail.com)

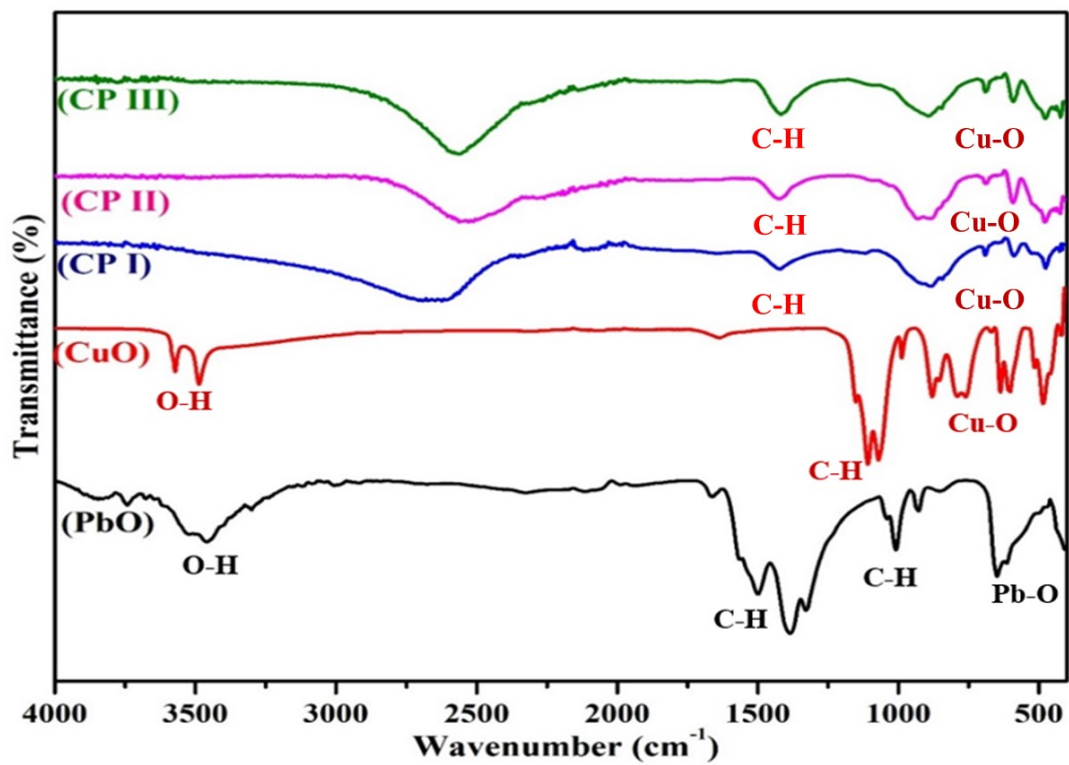

Fig. S1. FTIR spectrum of CuO, PbO and CuO/PbO heterojunction photocatalysts

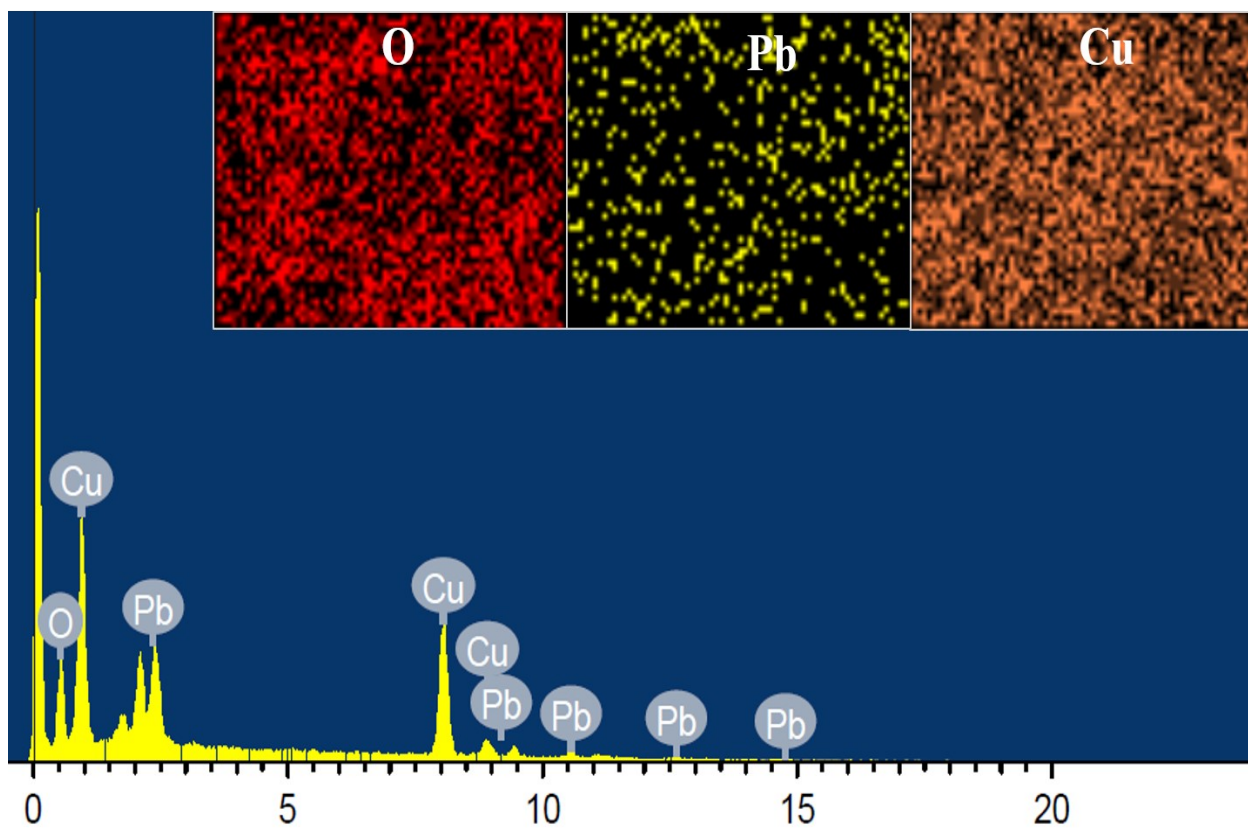

Fig. S2. EDS spectra and mapping of CuO/PbO heterojunction

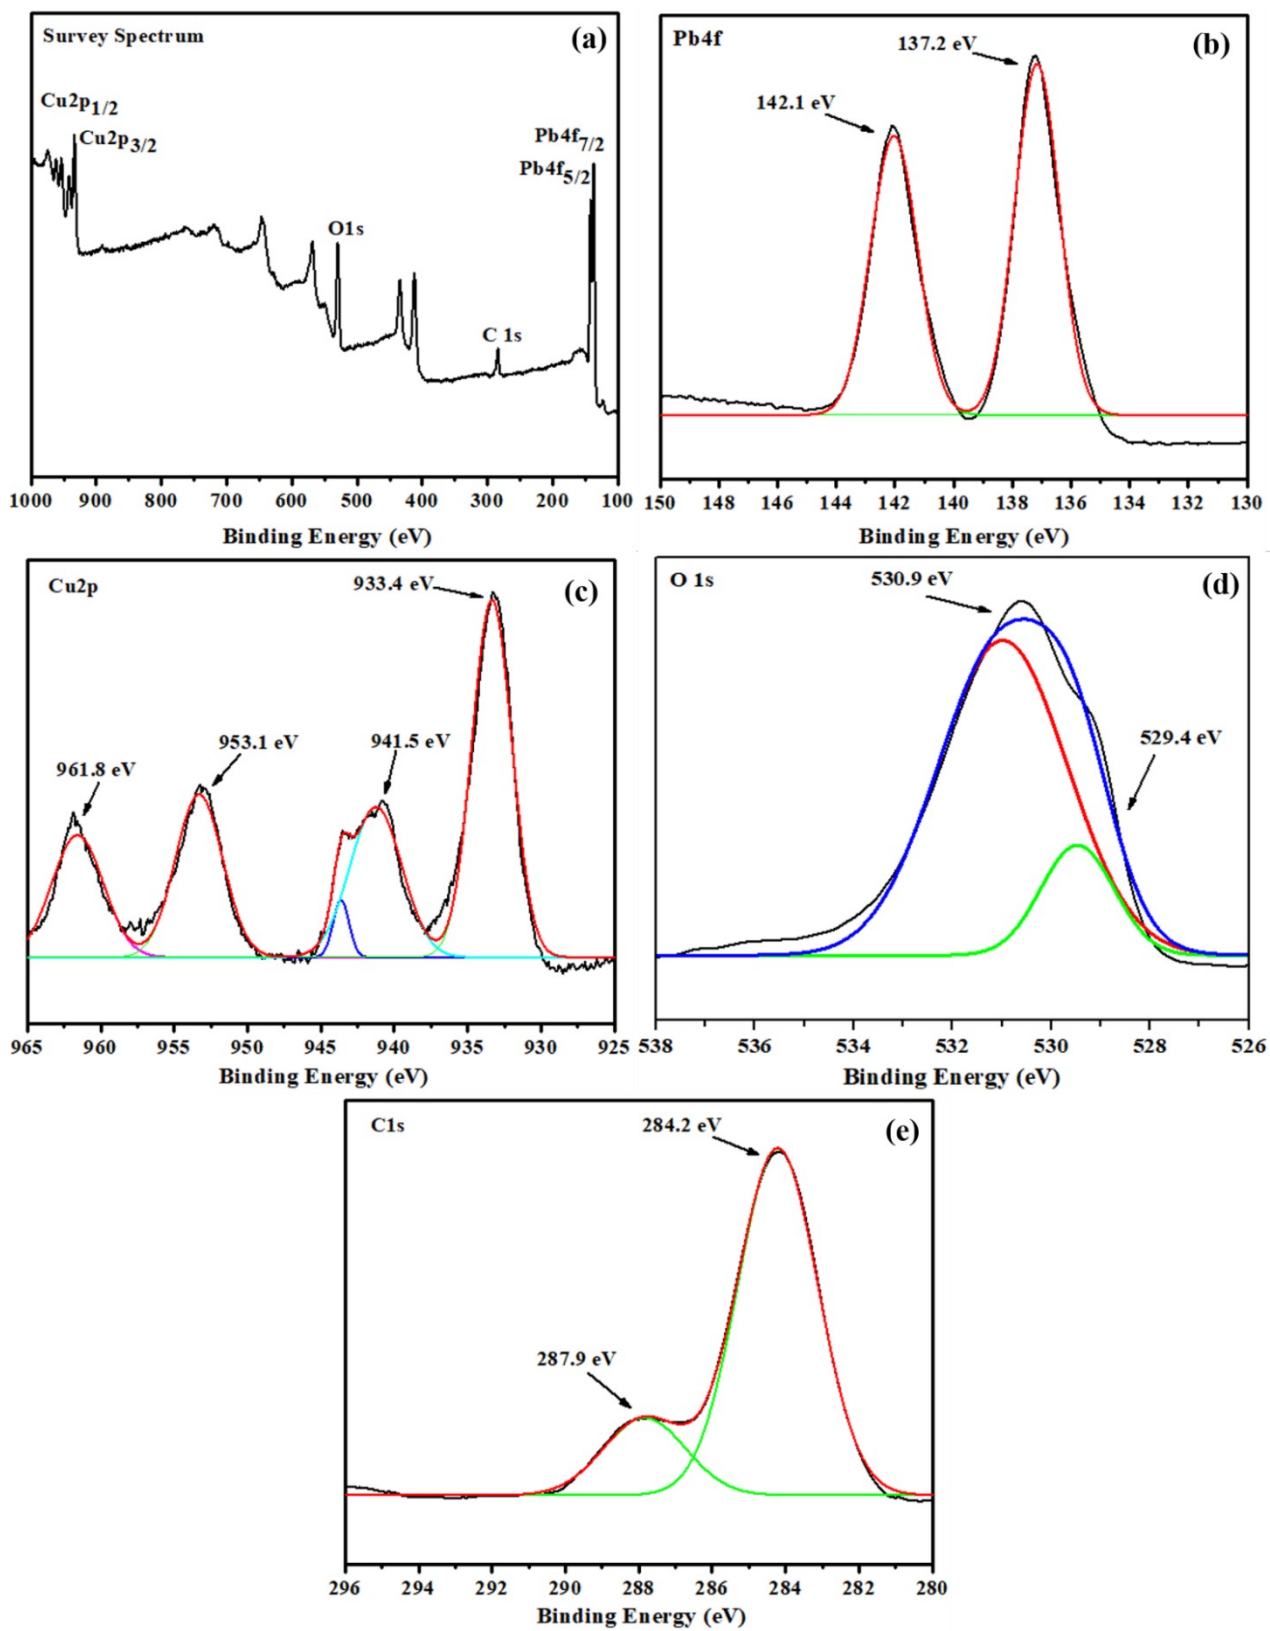

Fig. S3. XPS spectrum of CuO/PbO heterojunction.

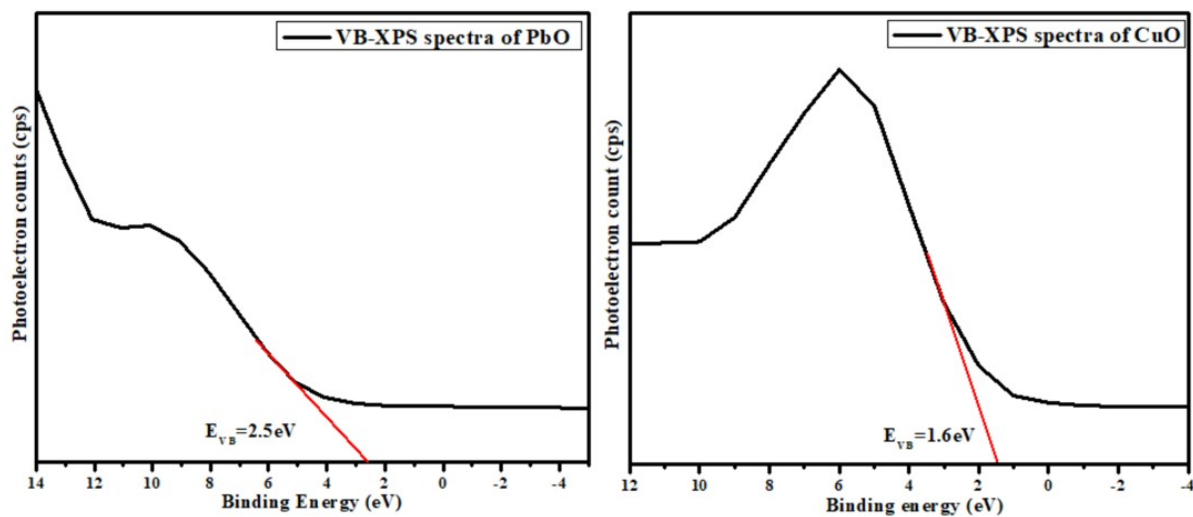

**Fig. S4.** VB-XPS spectra of PbO and CuO nanoparticles

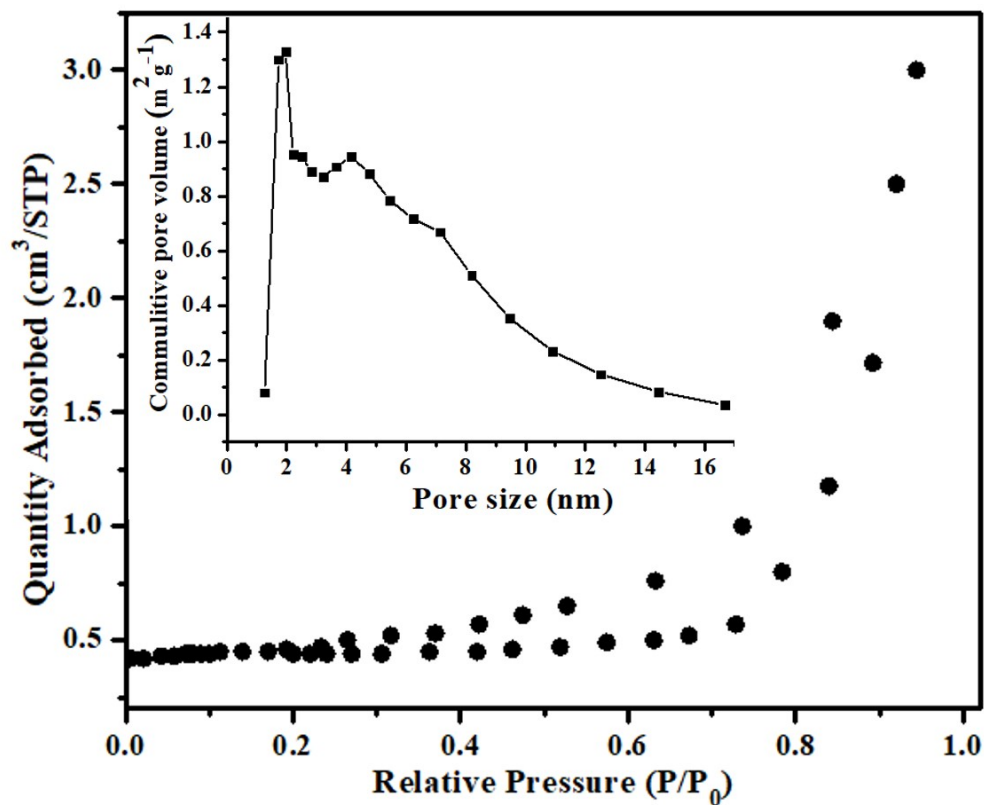

Fig. S5. Nitrogen adsorption–desorption isotherm (pore size distribution) for CuO/PbO heterojunction photocatalyst

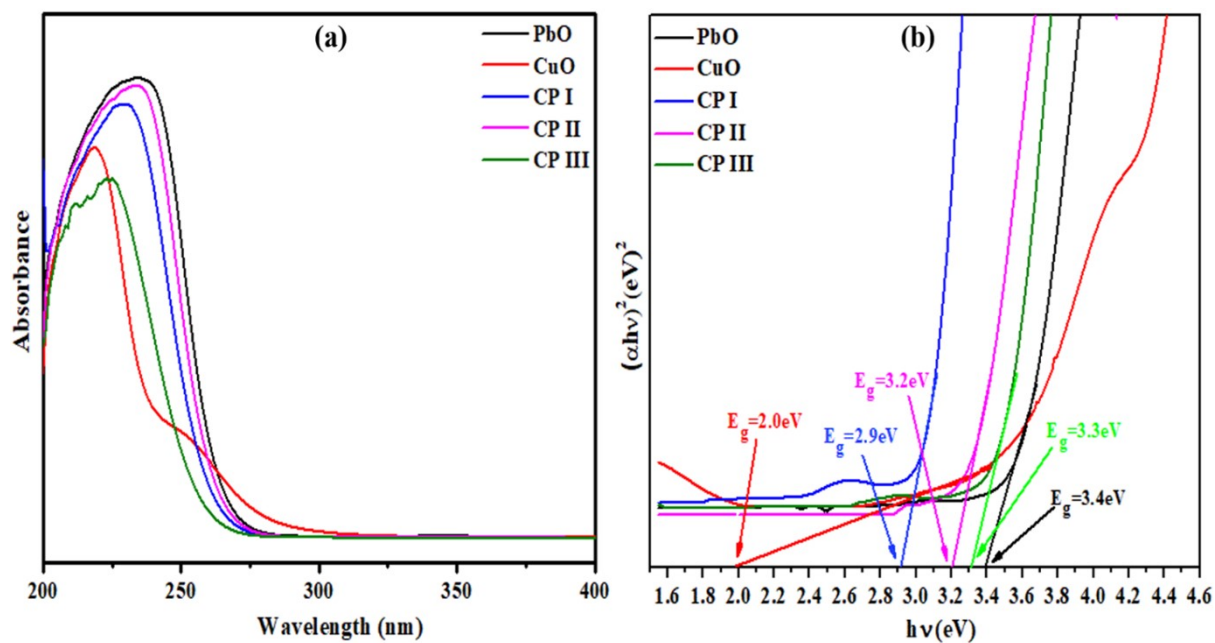

Fig. 6 Depiction of a) UV-Visible spectrum and b) tauc-plot band gap energy values of heterojunction photocatalysts

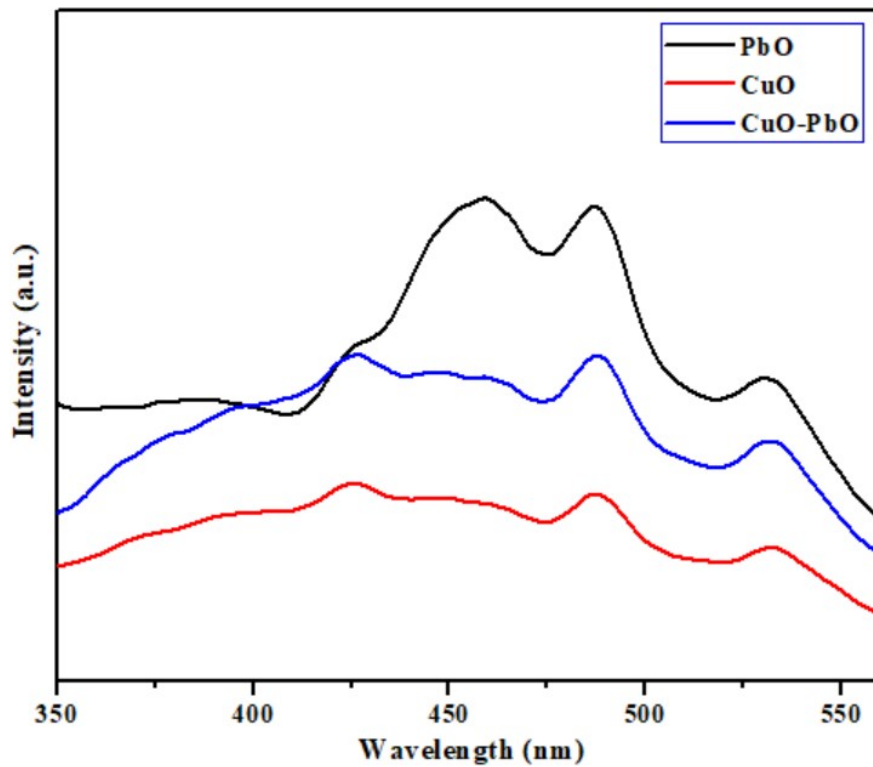

Fig. S7. PL spectrum of PbO, CuO semiconductors and CuO/PbO heterojunction photocatalyst

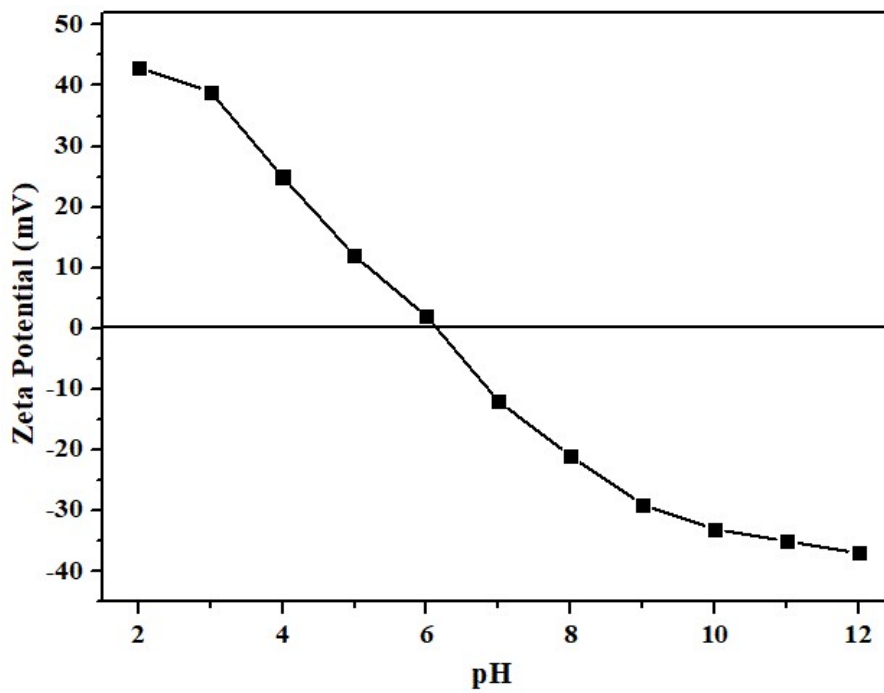

Fig. S8 Zeta potential of CuO/PbO heterojunction at different pH values

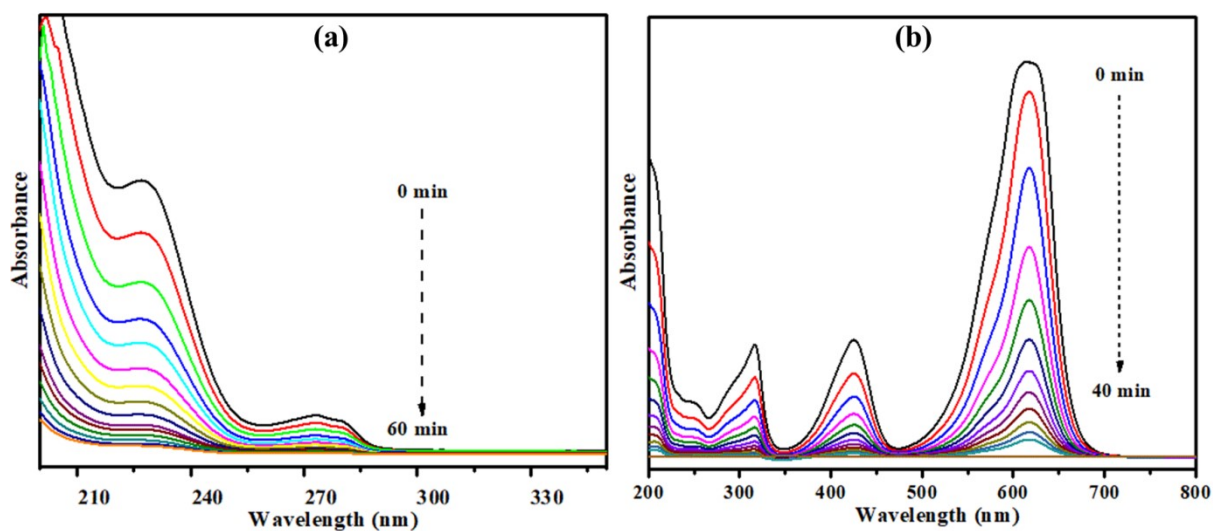

**Fig. S9** UV-visible absorbance spectrum of photocatalytic degradation of a) AMX and b) MG vs irradiation time

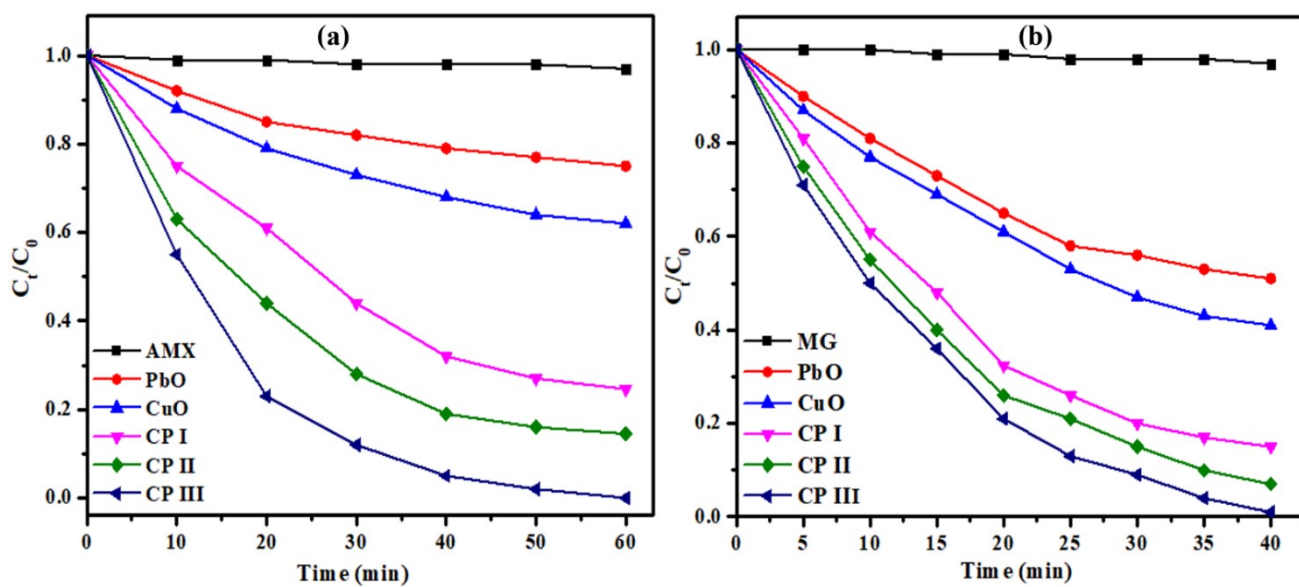

**Fig. S10** a-b) Degradation kinetics of AMX and MG vs irradiation time



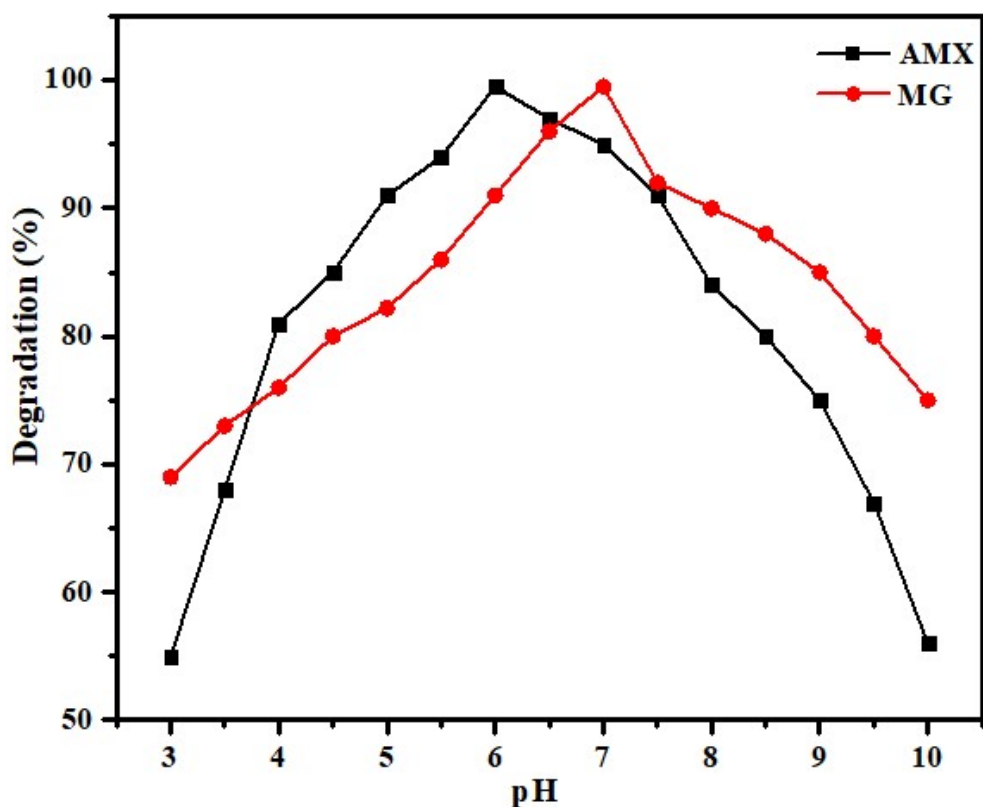

Fig. S11. Effect of pH value of solution on the AMX and MG pollutants photocatalysis

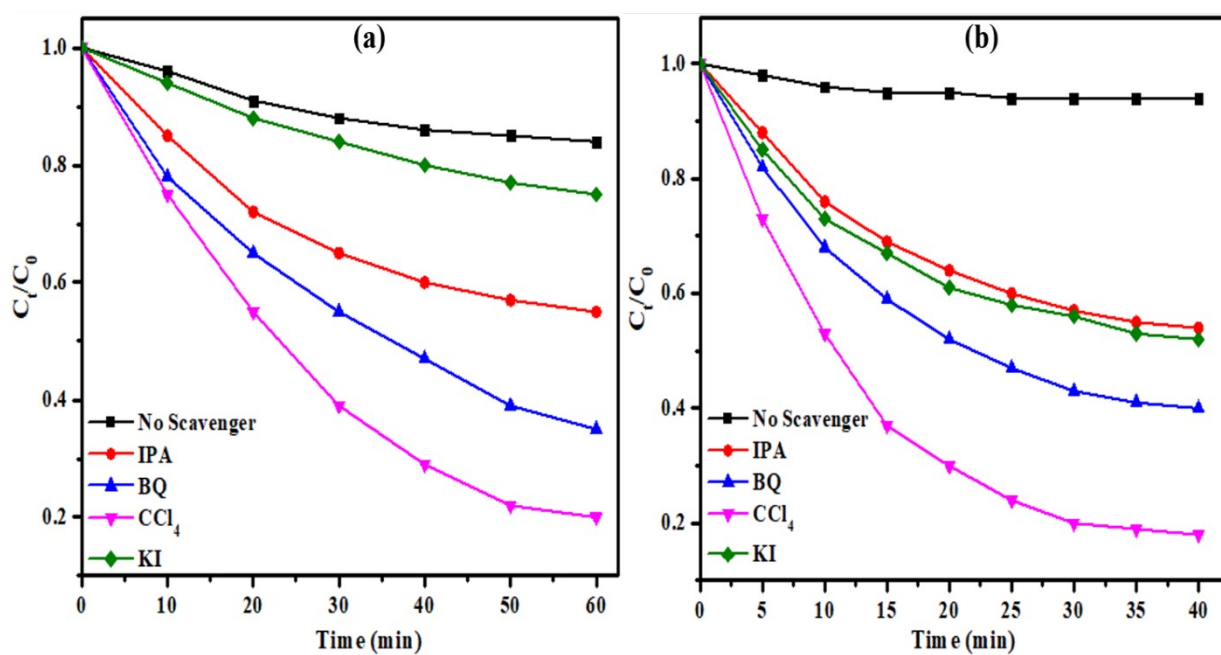

Fig. S12. Effect of scavengers on the change in concentration vs time for AMX and MG



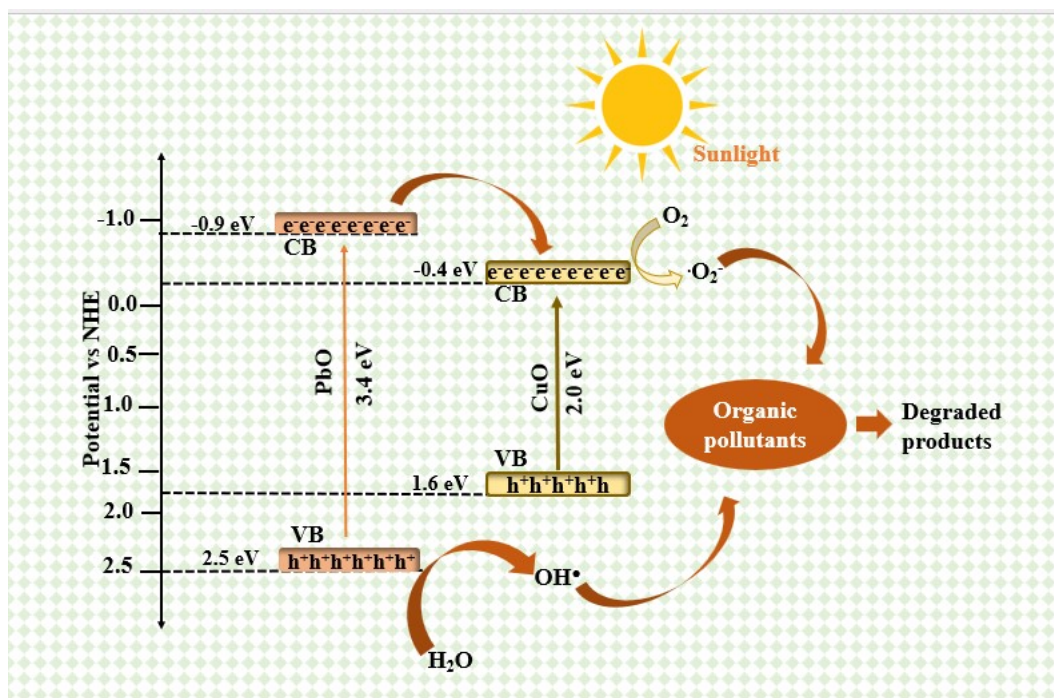

**Fig. S13.** A feasible strategy of the photocatalytic activity for antibiotic mineralization over CuO/PbO heterojunction

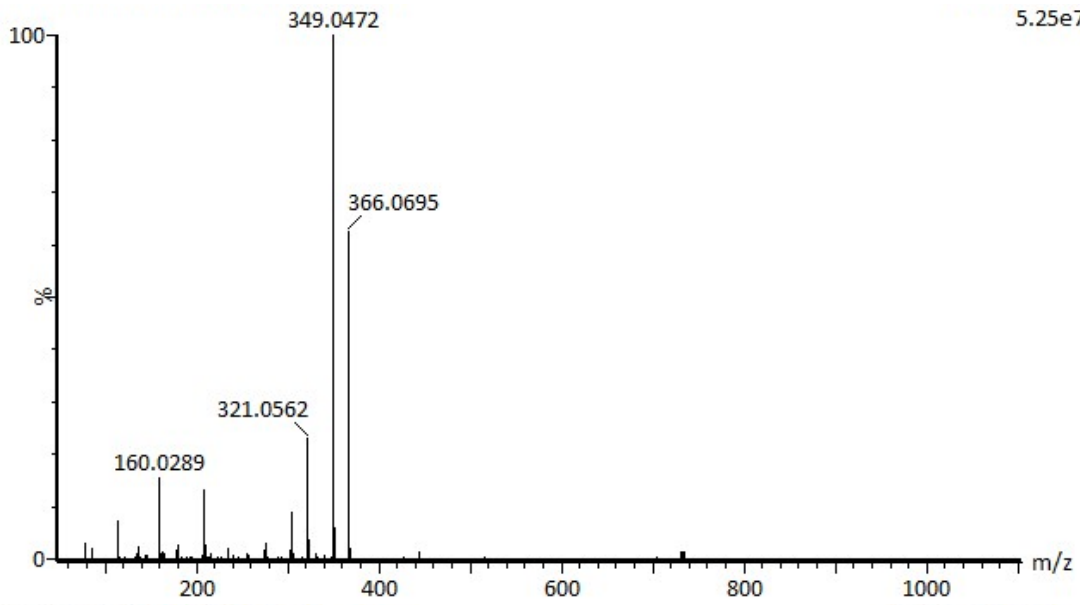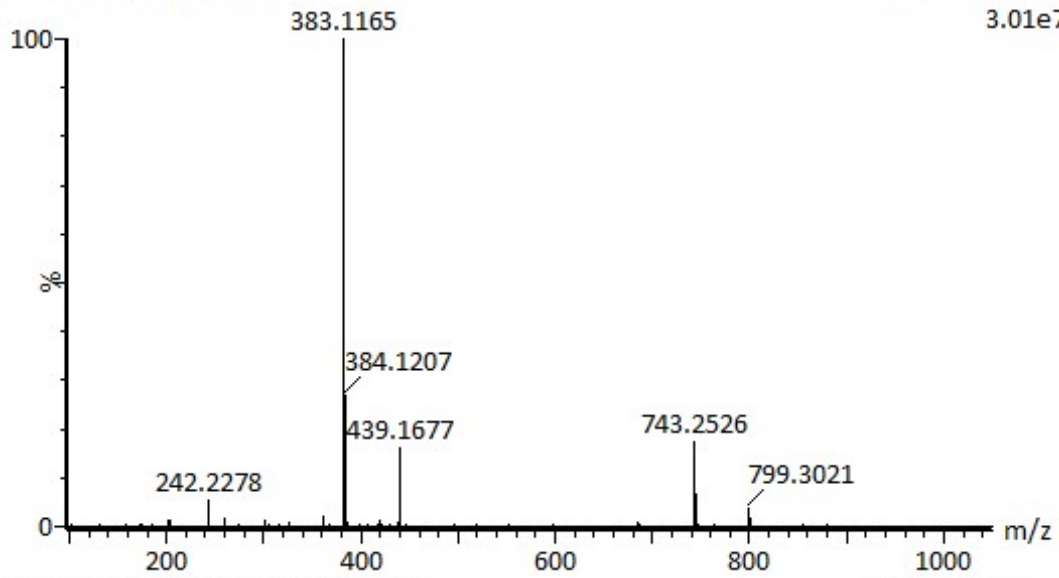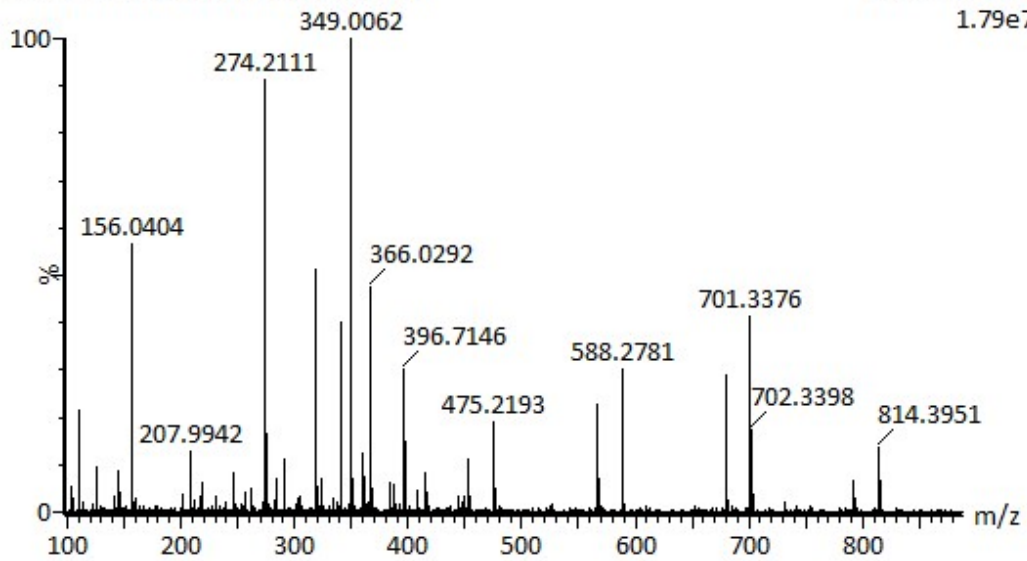

**Fig. S14.** Various intermediates generated during AMX degradation by CuO/PbO heterojunction detected by LC-MS technique

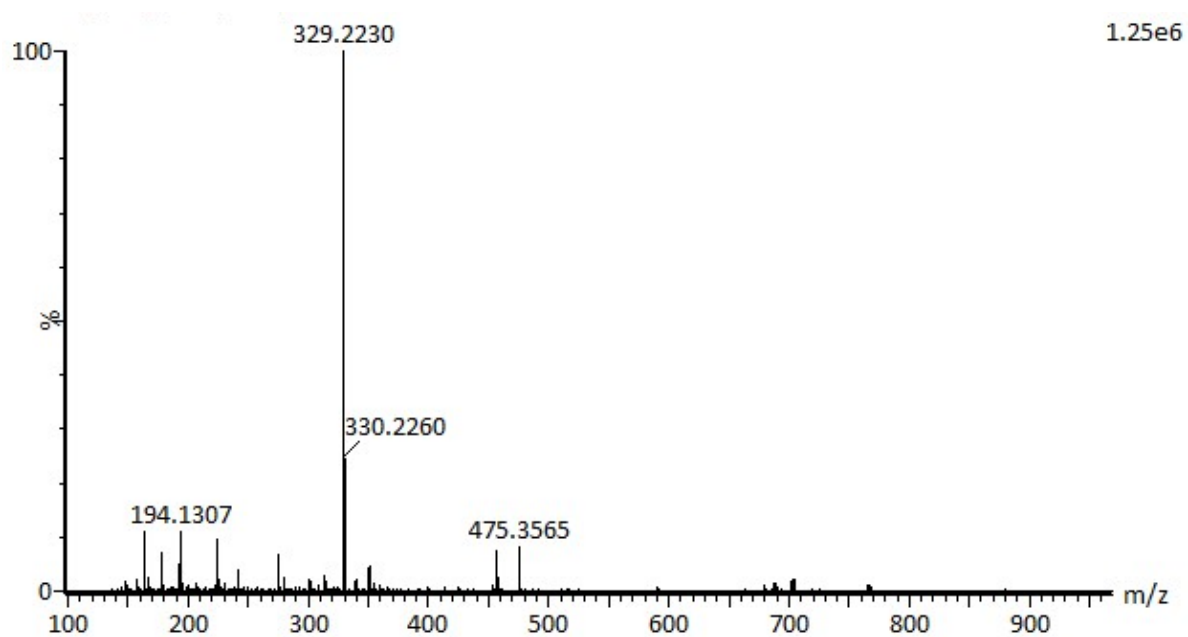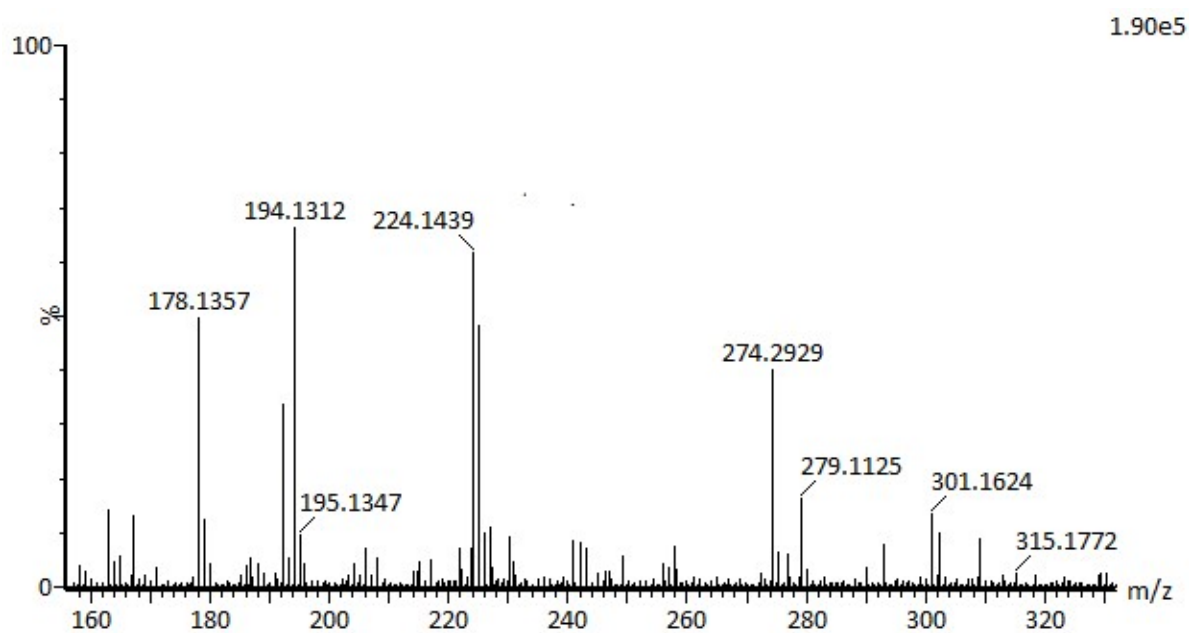

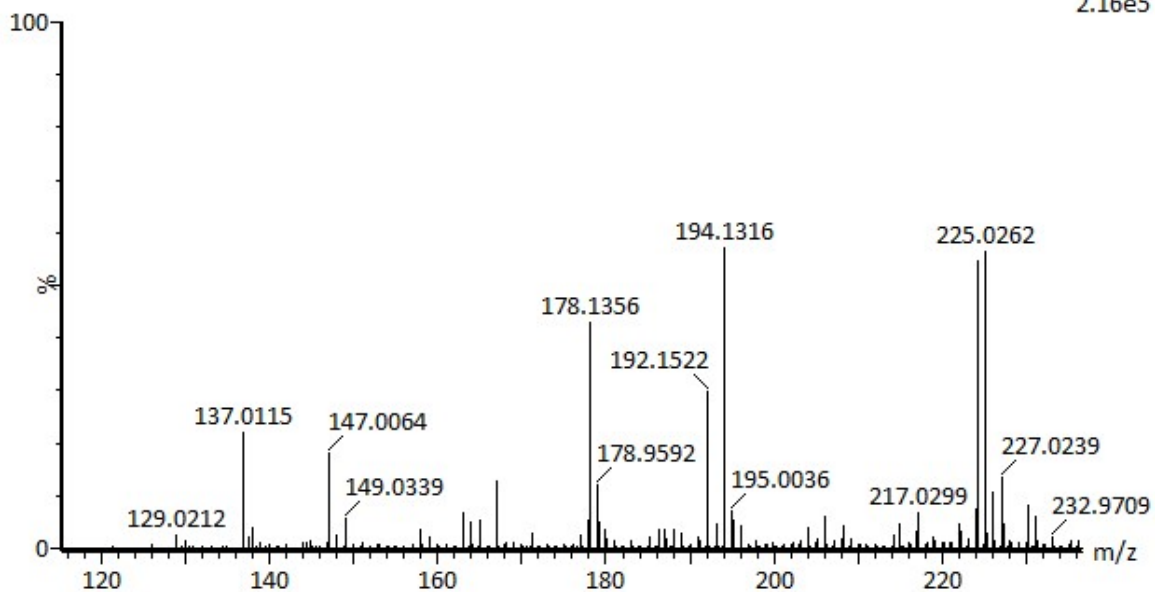

**Fig. S15.** Intermediates produced during MG dye degradation by CuO/PbO heterojunction detected by LC-MS

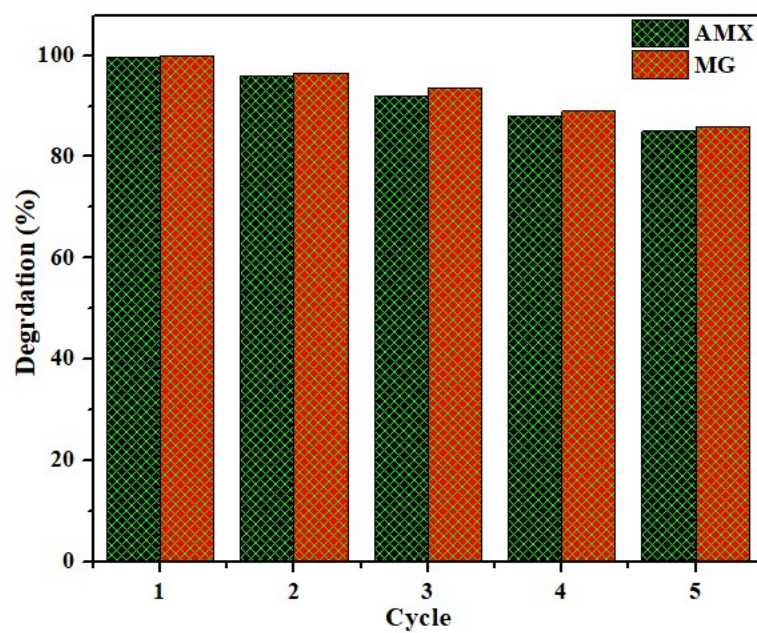

**Fig. S16.** Variation of degradation efficiency of the CuO/PbO heterojunction (CP-III) for AMX and MG dye over successive five cycles

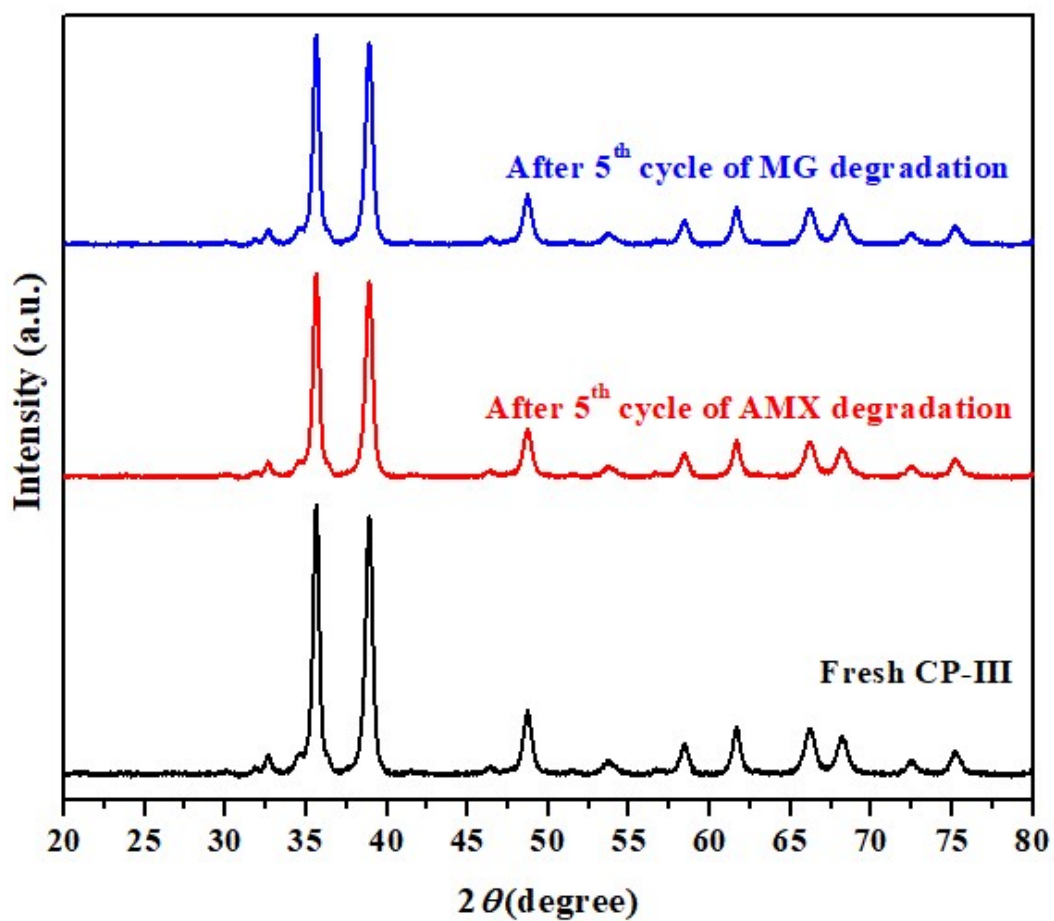

**Fig. S17.** XRD pattern of CZ III photocatalyst before and after 5 successive photocatalysis cycles
